# Supplementary material for: Genome-wide identification of HSF family in peach and functional analysis of PpHSF5 involvement in root and aerial organ development
Source: PeerJ. 2021 Mar 12;9:e10961. doi: 10.7717/peerj.10961 (PMC7958895; doi:10.7717/peerj.10961)
Supplement: Supplemental Information 3 — DSD: dispersed gene duplication; WGD: whole-genome duplication. [file peerj-09-10961-s003.xlsx]

## Sheet: Table S3
Table S3 Prevelance of duplication modes in the PpHSF family
Gene name	Gene ID	Gene duplication modes
PpHSF1	Prupe.1G021200	WGD
PpHSF2	Prupe.1G165500	DSD
PpHSF3	Prupe.1G335100	DSD
PpHSF4	Prupe.1G410400	WGD
PpHSF5	Prupe.1G433500	DSD
PpHSF6	Prupe.2G292100	WGD
PpHSF7	Prupe.3G108700	DSD
PpHSF8	Prupe.4G046000	DSD
PpHSF9	Prupe.4G068100	DSD
PpHSF10	Prupe.4G144200	DSD
PpHSF11	Prupe.5G031100	DSD
PpHSF12	Prupe.5G093200	WGD
PpHSF13	Prupe.7G056700	DSD
PpHSF14	Prupe.7G117200	DSD
PpHSF15	Prupe.7G133600	DSD
PpHSF16	Prupe.7G206900	WGD
PpHSF17	Prupe.7G231100	DSD
PpHSF18	Prupe.8G234900	WGD
DSD: dispersed gene duplication
WGD: whole-genome duplication
